# Supplementary material
Source: PubMed Central journal article supplement (PMC6303181)
Supplement: supp_6.4.E657_2018-0104-1-at.pdf [file supp_6.4.E657_2018-0104-1-at.pdf]

## **Appendix 1 (as supplied by the authors): MAID EPA focus group interview guide**

1. Based on your experience, what are the key elements of a MAID assessment? What are the key tasks required in performing a MAID procedure?
2. What knowledge would a provider need to possess in order to perform a MAID assessment and procedure successfully?
3. What skills would a provider need to possess in order to perform a MAID assessment and procedure successfully?
4. What are the attitudes or professional behaviours that a provider would need to demonstrate to be able to participate in MAID provision effectively?

[BREAK]

5. If you were to evaluate another provider's ability to perform a MAID assessment and procedure successfully, how would you go about doing so? If direct observation were to be used, what would you be observing?
6. At what point would you feel comfortable in trusting another provider to perform a MAID assessment and procedure independently? How many cases would they need to be able to complete successfully? Would they need to be assessed by more than one assessor? Would they need to be assessed in different types of cases e.g. malignant and non-malignant? Etc.
7. What teaching methods can you envision being effective in promoting development of the requisite knowledge, skills and attitudes that we have discussed? (Think about formal and informal teaching, experiential and reflective)
8. Any other thoughts/ideas to contribute?
