# Supplementary material
Source: PubMed Central journal article supplement (PMC6303181)
Supplement: supp_6.4.E657_COREQ-checklist.pdf [file supp_6.4.E657_COREQ-checklist.pdf]

**Table 1**

Consolidated criteria for reporting qualitative studies (COREQ): 32-item checklist

| No                                                     | Item                                     | Guide questions/description                                                                                     |        |
|--------------------------------------------------------|------------------------------------------|-----------------------------------------------------------------------------------------------------------------|--------|
| <b>Domain 1:<br/>Research team<br/>and reflexivity</b> |                                          |                                                                                                                 |        |
| Personal<br>Characteristics                            |                                          |                                                                                                                 |        |
| 1.                                                     | Interviewer/facilitator                  | Which author/s conducted the interview or focus group?                                                          | Page 5 |
| 2.                                                     | Credentials                              | What were the researcher's credentials? <i>E.g. PhD, MD</i>                                                     | Page 5 |
| 3.                                                     | Occupation                               | What was their occupation at the time of the study?                                                             | Page 5 |
| 4.                                                     | Gender                                   | Was the researcher male or female?                                                                              | Page 1 |
| 5.                                                     | Experience and training                  | What experience or training did the researcher have?                                                            | Page 5 |
| Relationship with participants                         |                                          |                                                                                                                 |        |
| 6.                                                     | Relationship established                 | Was a relationship established prior to study commencement?                                                     | Page 4 |
| 7.                                                     | Participant knowledge of the interviewer | What did the participants know about the researcher? <i>e.g. personal goals, reasons for doing the research</i> | Page 5 |
| 8.                                                     | Interviewer characteristics              | What characteristics were reported about the interviewer/facilitator?                                           | N/A    |

| No                            | Item                                  | Guide questions/description                                                                                                                                     |          |
|-------------------------------|---------------------------------------|-----------------------------------------------------------------------------------------------------------------------------------------------------------------|----------|
|                               |                                       | <i>e.g. Bias, assumptions, reasons and interests in the research topic</i>                                                                                      |          |
| <b>Domain 2: study design</b> |                                       |                                                                                                                                                                 |          |
| Theoretical framework         |                                       |                                                                                                                                                                 |          |
| 9.                            | Methodological orientation and Theory | What methodological orientation was stated to underpin the study? <i>e.g. grounded theory, discourse analysis, ethnography, phenomenology, content analysis</i> | Page 5-6 |
| Participant selection         |                                       |                                                                                                                                                                 |          |
| 10.                           | Sampling                              | How were participants selected? <i>e.g. purposive, convenience, consecutive, snowball</i>                                                                       | Page 4   |
| 11.                           | Method of approach                    | How were participants approached? <i>e.g. face-to-face, telephone, mail, email</i>                                                                              | Page 5   |
| 12.                           | Sample size                           | How many participants were in the study?                                                                                                                        | Page 6-7 |
| 13.                           | Non-participation                     | How many people refused to participate or dropped out? Reasons?                                                                                                 | Page 6-7 |
| Setting                       |                                       |                                                                                                                                                                 |          |
| 14.                           | Setting of data collection            | Where was the data collected? <i>e.g. home, clinic, workplace</i>                                                                                               | Page 6   |

| No                                          | Item                         | Guide questions/description                                                              |                  |
|---------------------------------------------|------------------------------|------------------------------------------------------------------------------------------|------------------|
| 15.                                         | Presence of non-participants | Was anyone else present besides the participants and researchers?                        | N/A.             |
| 16.                                         | Description of sample        | What are the important characteristics of the sample? <i>e.g. demographic data, date</i> | Page 6, Table 1. |
| Data collection                             |                              |                                                                                          |                  |
| 17.                                         | Interview guide              | Were questions, prompts, guides provided by the authors? Was it pilot tested?            | Page 5.          |
| 18.                                         | Repeat interviews            | Were repeat interviews carried out? If yes, how many?                                    | N/A              |
| 19.                                         | Audio/visual recording       | Did the research use audio or visual recording to collect the data?                      | Page 5, Audio    |
| 20.                                         | Field notes                  | Were field notes made during and/or after the interview or focus group?                  | Yes- page 5      |
| 21.                                         | Duration                     | What was the duration of the interviews or focus group?                                  | Page 5           |
| 22.                                         | Data saturation              | Was data saturation discussed?                                                           | Page 7           |
| 23.                                         | Transcripts returned         | Were transcripts returned to participants for comment and/or correction?                 | N/A              |
| <b>Domain 3:<br/>analysis and findingsz</b> |                              |                                                                                          |                  |
| Data analysis                               |                              |                                                                                          |                  |

| No        | Item                           | Guide questions/description                                                                                                              |                    |
|-----------|--------------------------------|------------------------------------------------------------------------------------------------------------------------------------------|--------------------|
| 24.       | Number of data coders          | How many data coders coded the data?                                                                                                     | Page 5             |
| 25.       | Description of the coding tree | Did authors provide a description of the coding tree?                                                                                    | N/A                |
| 26.       | Derivation of themes           | Were themes identified in advance or derived from the data?                                                                              | From data- p. 5    |
| 27.       | Software                       | What software, if applicable, was used to manage the data?                                                                               | N/A                |
| 28.       | Participant checking           | Did participants provide feedback on the findings?                                                                                       | Yes- page 5        |
| Reporting |                                |                                                                                                                                          |                    |
| 29.       | Quotations presented           | Were participant quotations presented to illustrate the themes / findings? Was each quotation identified? e.g. <i>participant number</i> | N/A                |
| 30.       | Data and findings consistent   | Was there consistency between the data presented and the findings?                                                                       | Page 7, Appendix 1 |
| 31.       | Clarity of major themes        | Were major themes clearly presented in the findings?                                                                                     | Page 7, Appendix 1 |
| 32.       | Clarity of minor themes        | Is there a description of diverse cases or discussion of minor themes?                                                                   | Appendix 1         |
